# Supplementary material for: Tyrosine 1–phosphorylated RNA polymerase II transcribes PROMPTs to facilitate proximal promoter pausing and induce global transcriptional repression in response to DNA damage
Source: PubMed Central journal article supplement (PMC10984383; doi:10.1101/gr.278644.123), 2024-02
Supplement: Supplemental_Fig_S1.pdf [file Supplemental_Fig_S1.pdf]

**A**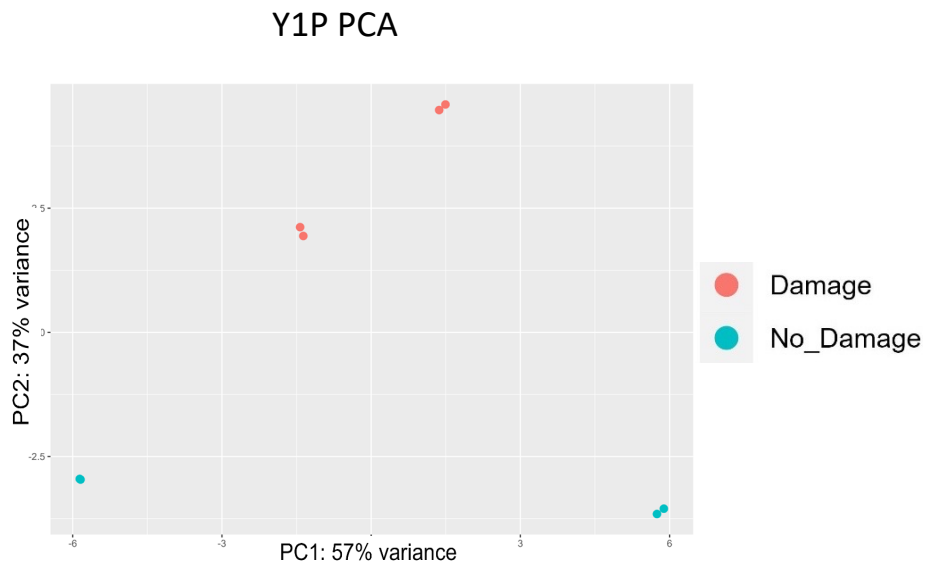**B**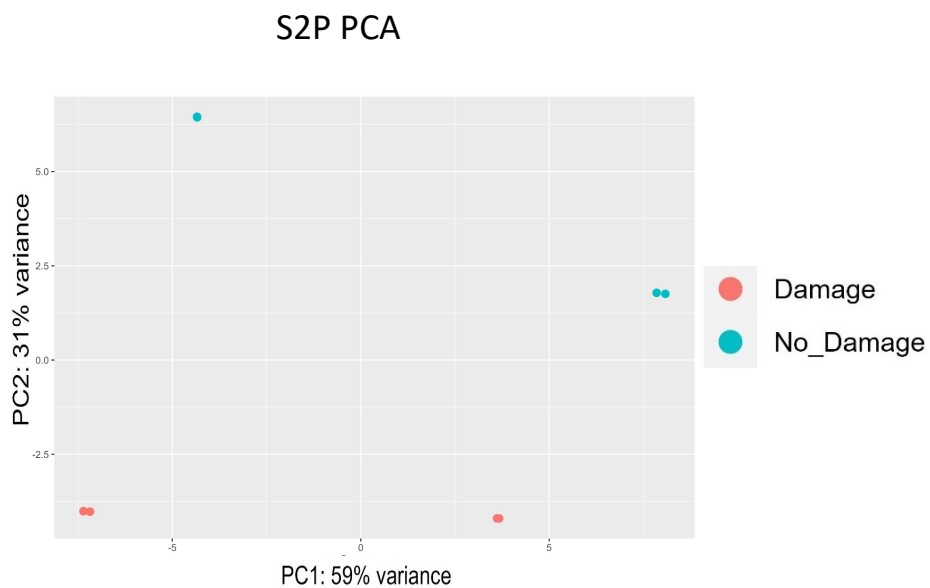**C**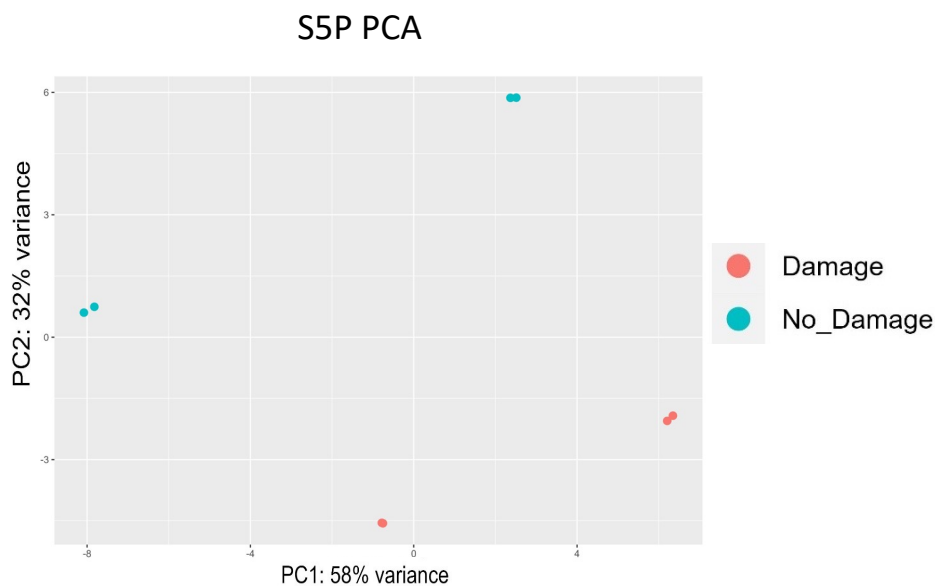

**Figure S1.** Principal Component Analysis of mNET-Seq read coverage across gene body. **A)** PCA plot of Y1P replicates from damage and no damage conditions. **B)** PCA plot of S2P replicates from damage and no damage conditions. **C)** PCA plot of S5P replicates from damage and no damage conditions.
