# Supplementary material for: Tyrosine 1–phosphorylated RNA polymerase II transcribes PROMPTs to facilitate proximal promoter pausing and induce global transcriptional repression in response to DNA damage
Source: PubMed Central journal article supplement (PMC10984383; doi:10.1101/gr.278644.123), 2024-02
Supplement: Supplemental_Fig_S2.pdf [file Supplemental_Fig_S2.pdf]

**A** up-regulated ( $p_{adj} < 0.05$ ,  $l_2FC > 0.1$ ) PCGs

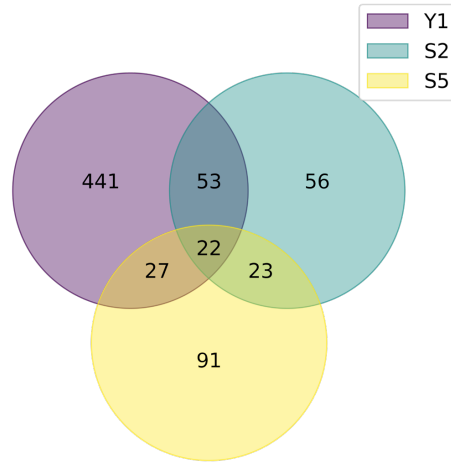

**B**

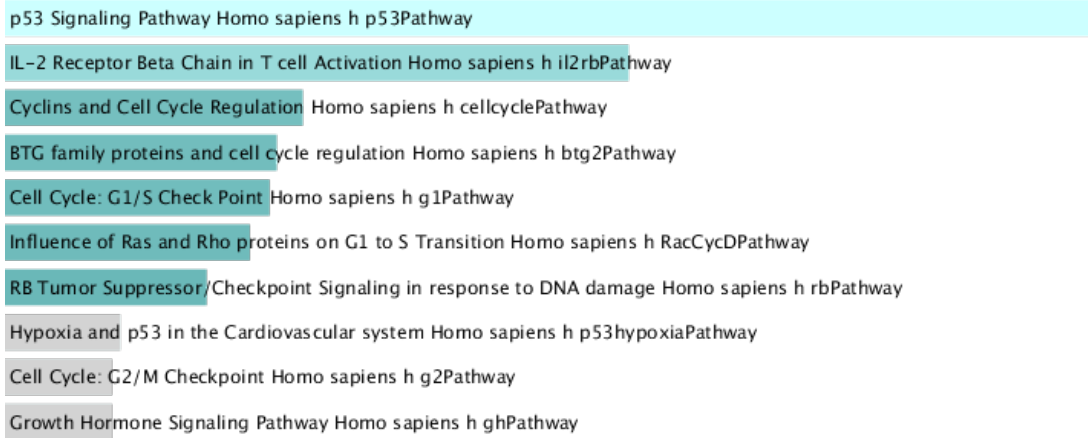

**C**

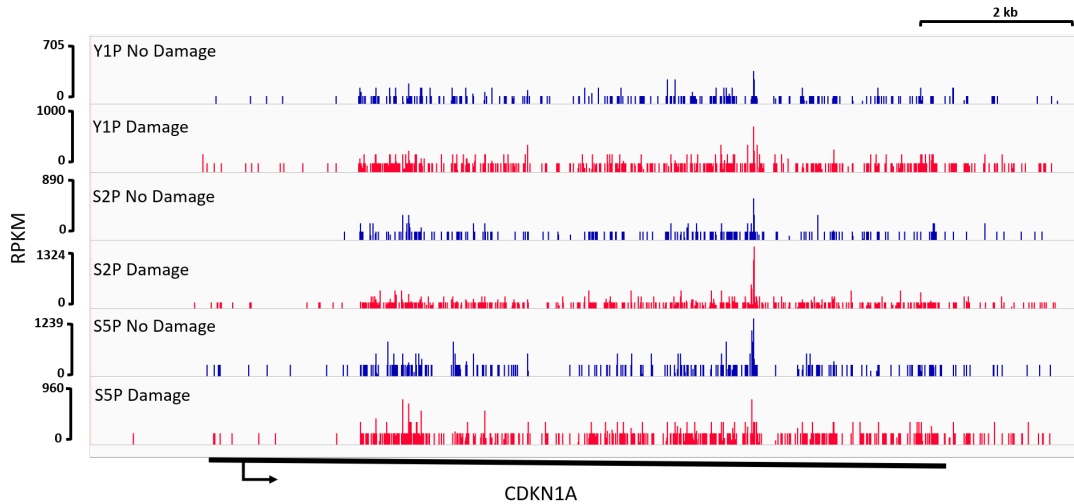

**Figure S2.** Analysis of up-regulated protein-coding genes upon DNA damage. **A)** Venn diagram of significantly up-regulated ( $p_{adj} < 0.05$ ,  $\log_2FC > 0.1$ ) protein-coding genes based on read coverage across gene body from Y1P, S2P and S5P sample2s after IR. **B)** GO enrichment of significantly up-regulated genes across Y1P, S2P, S5P samples upon IR. **C)** IGV profile of mNET-seq signal across a representative up-regulated gene, CDKN1A.
