# Supplementary material for: Tyrosine 1–phosphorylated RNA polymerase II transcribes PROMPTs to facilitate proximal promoter pausing and induce global transcriptional repression in response to DNA damage
Source: PubMed Central journal article supplement (PMC10984383; doi:10.1101/gr.278644.123), 2024-02
Supplement: Supplemental_Fig_S3.pdf [file Supplemental_Fig_S3.pdf]

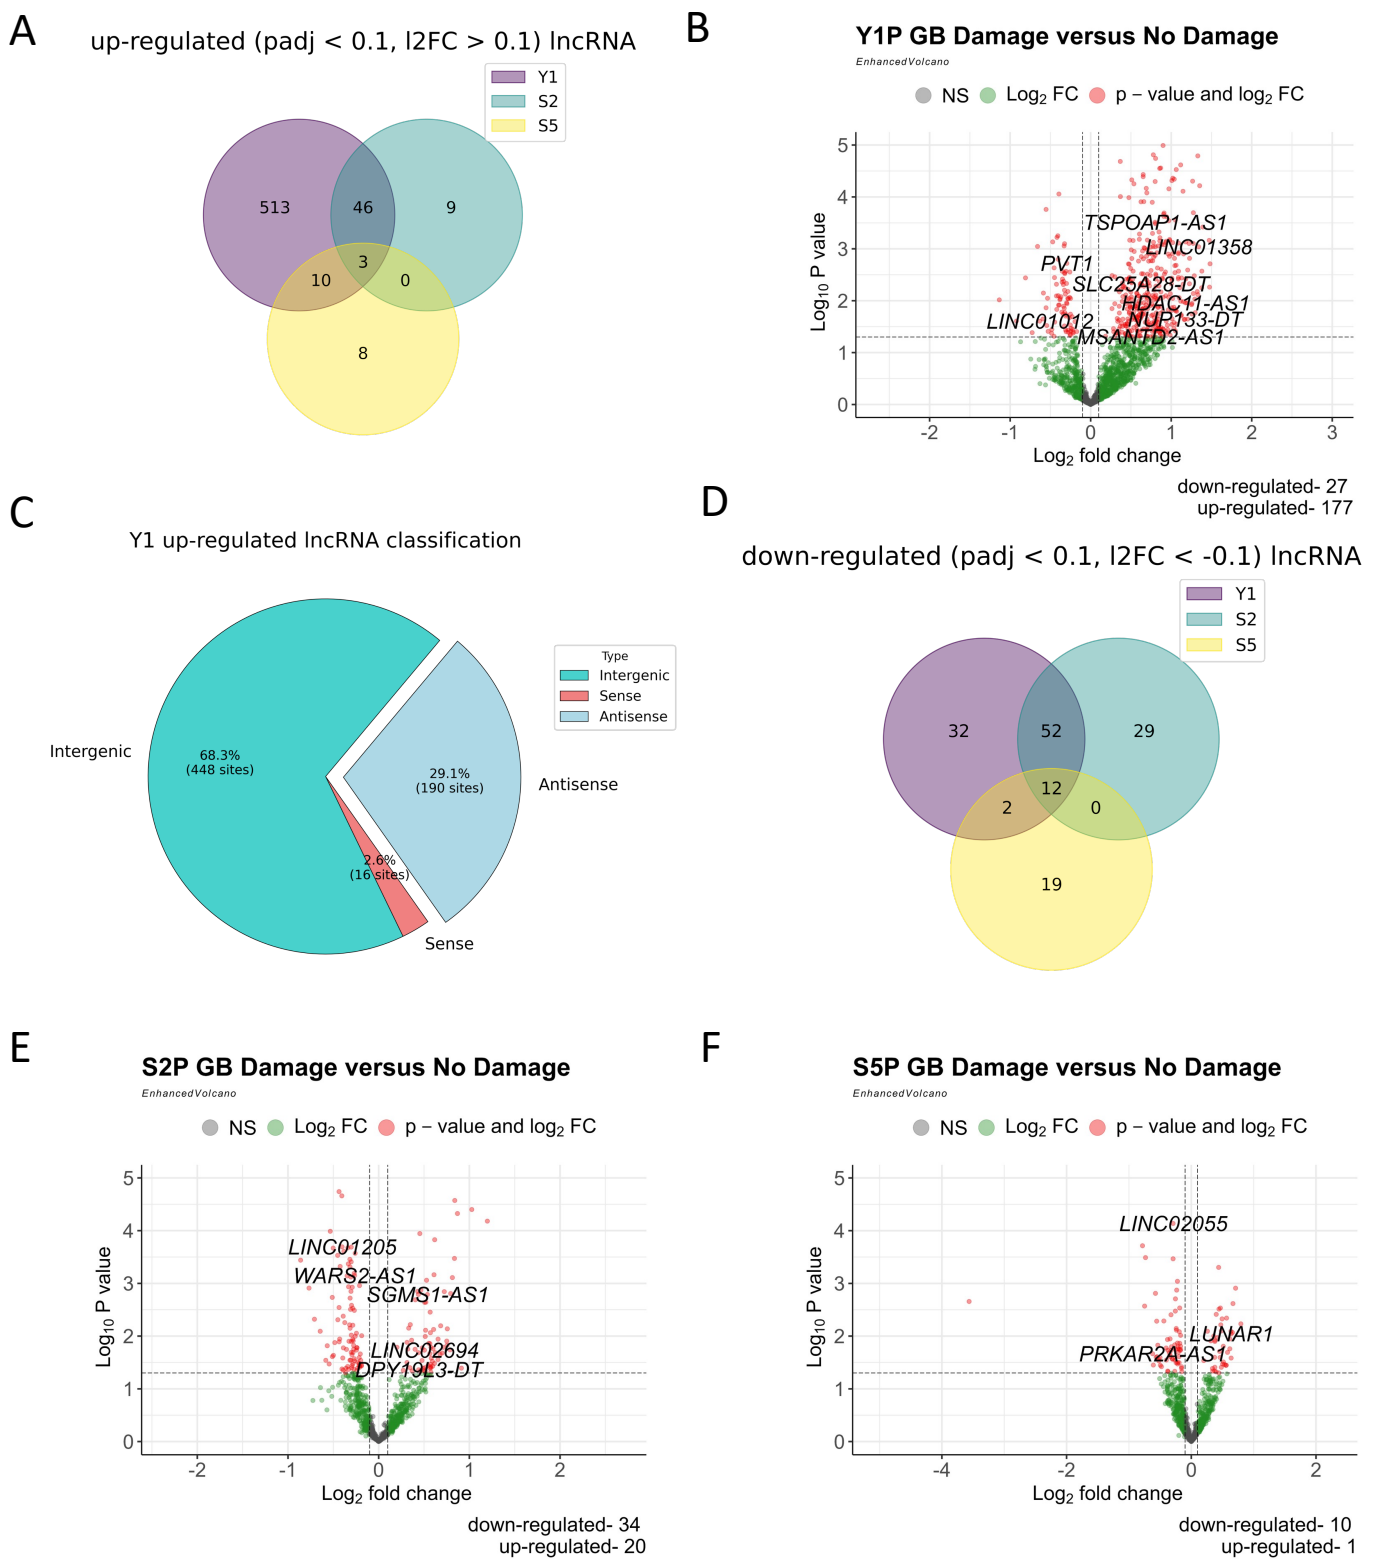

**Figure S3.** Analysis of long non-coding RNA (lncRNA) expression upon DNA damage. **A)** Venn diagram of significantly up-regulated ( $\text{padj} < 0.05$ ,  $\text{log}_2\text{FC} > 0.1$ ) lncRNA based on read coverage across gene body from Y1P, S2P and S5P samples after IR. **B)** Volcano plots of differentially expressed lncRNA based on read coverage across GB from Y1P samples upon IR. **C)** Pie chart showing proportion of differentially expressed ( $\text{padj} < 0.05$ ) lncRNA which are sense, anti-sense and intergenic from Y1P samples upon IR. **D)** Venn diagram of significantly down-regulated ( $\text{padj} < 0.05$ ,  $\text{log}_2\text{FC} < -0.1$ ) lncRNA based on read coverage across gene body from Y1P, S2P and S5P samples after IR. **E)** Volcano plots of lncRNA based on read coverage across GB from S2P samples upon IR. **F)** Volcano plots of differentially expressed lncRNA based on read coverage across GB from S5P samples upon IR.
