# Supplementary material for: Tyrosine 1–phosphorylated RNA polymerase II transcribes PROMPTs to facilitate proximal promoter pausing and induce global transcriptional repression in response to DNA damage
Source: PubMed Central journal article supplement (PMC10984383; doi:10.1101/gr.278644.123), 2024-02
Supplement: Supplemental_Fig_S5.pdf [file Supplemental_Fig_S5.pdf]

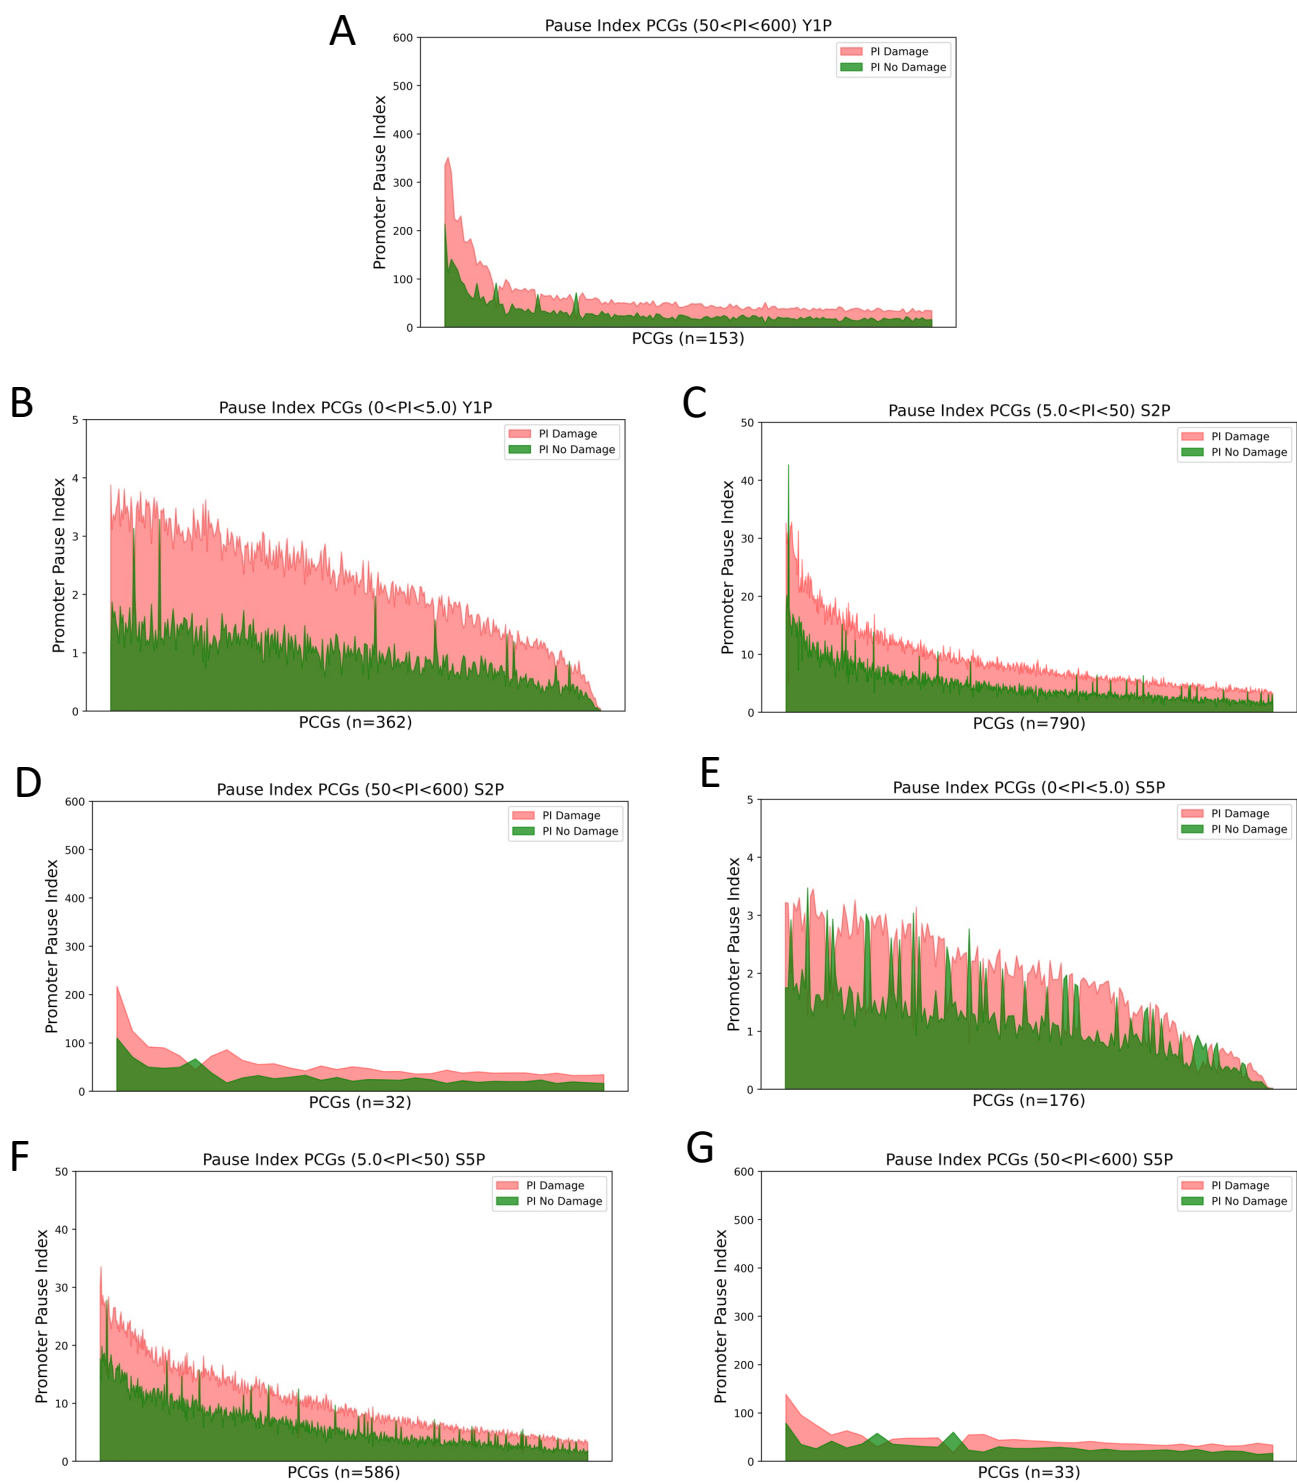

**Figure S5.** Analysis of promoter pausing index upon DNA damage. **A)** Line plot showing change in Pause Index(PI) of protein-coding genes belonging to high PI category ( $50 < PI < 600$ ) from Y1P samples upon IR. **B)** Line plot showing change in Pause Index(PI) of protein-coding genes belonging to low PI category ( $0 < PI < 5$ ) from S2P samples upon IR. **C)** Line plot showing change in Pause Index(PI) of protein-coding genes belonging to moderate PI category ( $5 < PI < 50$ ) from S2P samples upon IR. **D)** Line plot showing change in Pause Index(PI) of protein-coding genes belonging to high PI category from S2P samples upon IR. **E)** Line plot showing change in Pause Index(PI) of protein-coding genes belonging to low PI category from S5P samples upon IR. **F)** Line plot showing change in Pause Index(PI) of protein-coding genes belonging to moderate PI category from S5P samples upon IR. **G)** Line plot showing change in Pause Index(PI) of protein-coding genes belonging to high PI category from S5P samples upon IR. Only genes that show significant ( $p < 0.05$ ) change in PI are plotted.
