# Supplementary material for: Tyrosine 1–phosphorylated RNA polymerase II transcribes PROMPTs to facilitate proximal promoter pausing and induce global transcriptional repression in response to DNA damage
Source: PubMed Central journal article supplement (PMC10984383; doi:10.1101/gr.278644.123), 2024-02
Supplement: Supplemental_Fig_S6.pdf [file Supplemental_Fig_S6.pdf]

**A**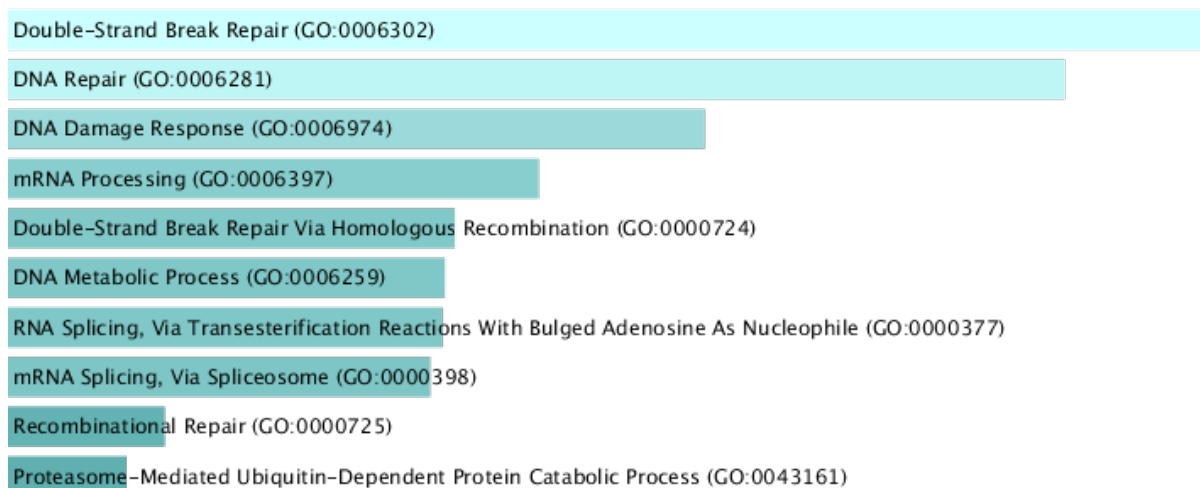**B**

GB read coverage of DNA Repair Genes showing significant increase in PI from Y1

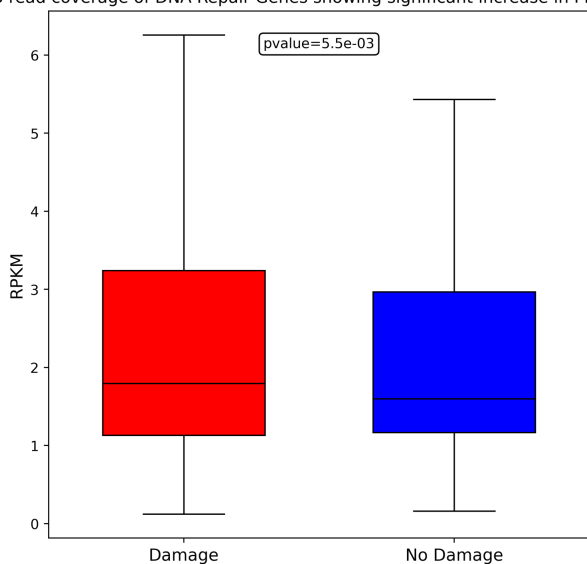**C**

PPR read coverage of DNA Repair Genes showing significant increase in PI from Y1

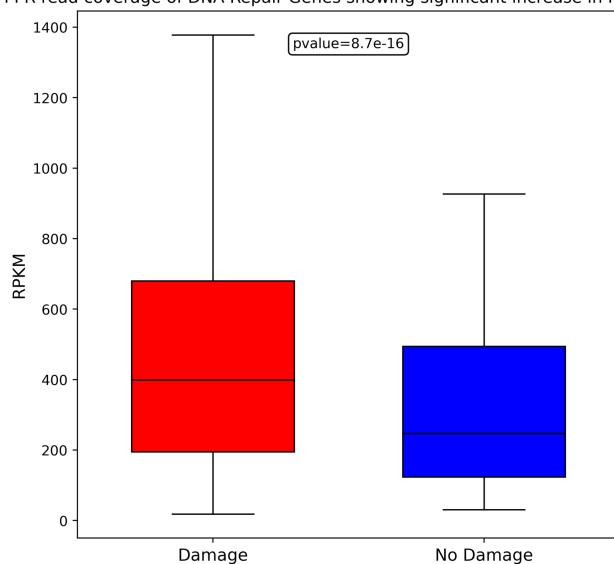

**Figure S6.** Enrichment analysis of genes with increased promoter pausing index upon DNA damage. **A)** GO enrichment of protein-coding genes showing significant increase in pause index from Y1P samples upon IR. **B)** Box plot indicates mNET-Seq read coverage across GB of DNA repair genes. **C)** Box plot indicates mNET-Seq read coverage across proximal promoter region of DNA repair genes. Two sample Wilcoxon test is used to compute statistical significance of coverage between damage and no damage samples.
