# Supplementary material for: Tyrosine 1–phosphorylated RNA polymerase II transcribes PROMPTs to facilitate proximal promoter pausing and induce global transcriptional repression in response to DNA damage
Source: PubMed Central journal article supplement (PMC10984383; doi:10.1101/gr.278644.123), 2024-02
Supplement: Supplemental_Fig_S7.pdf [file Supplemental_Fig_S7.pdf]

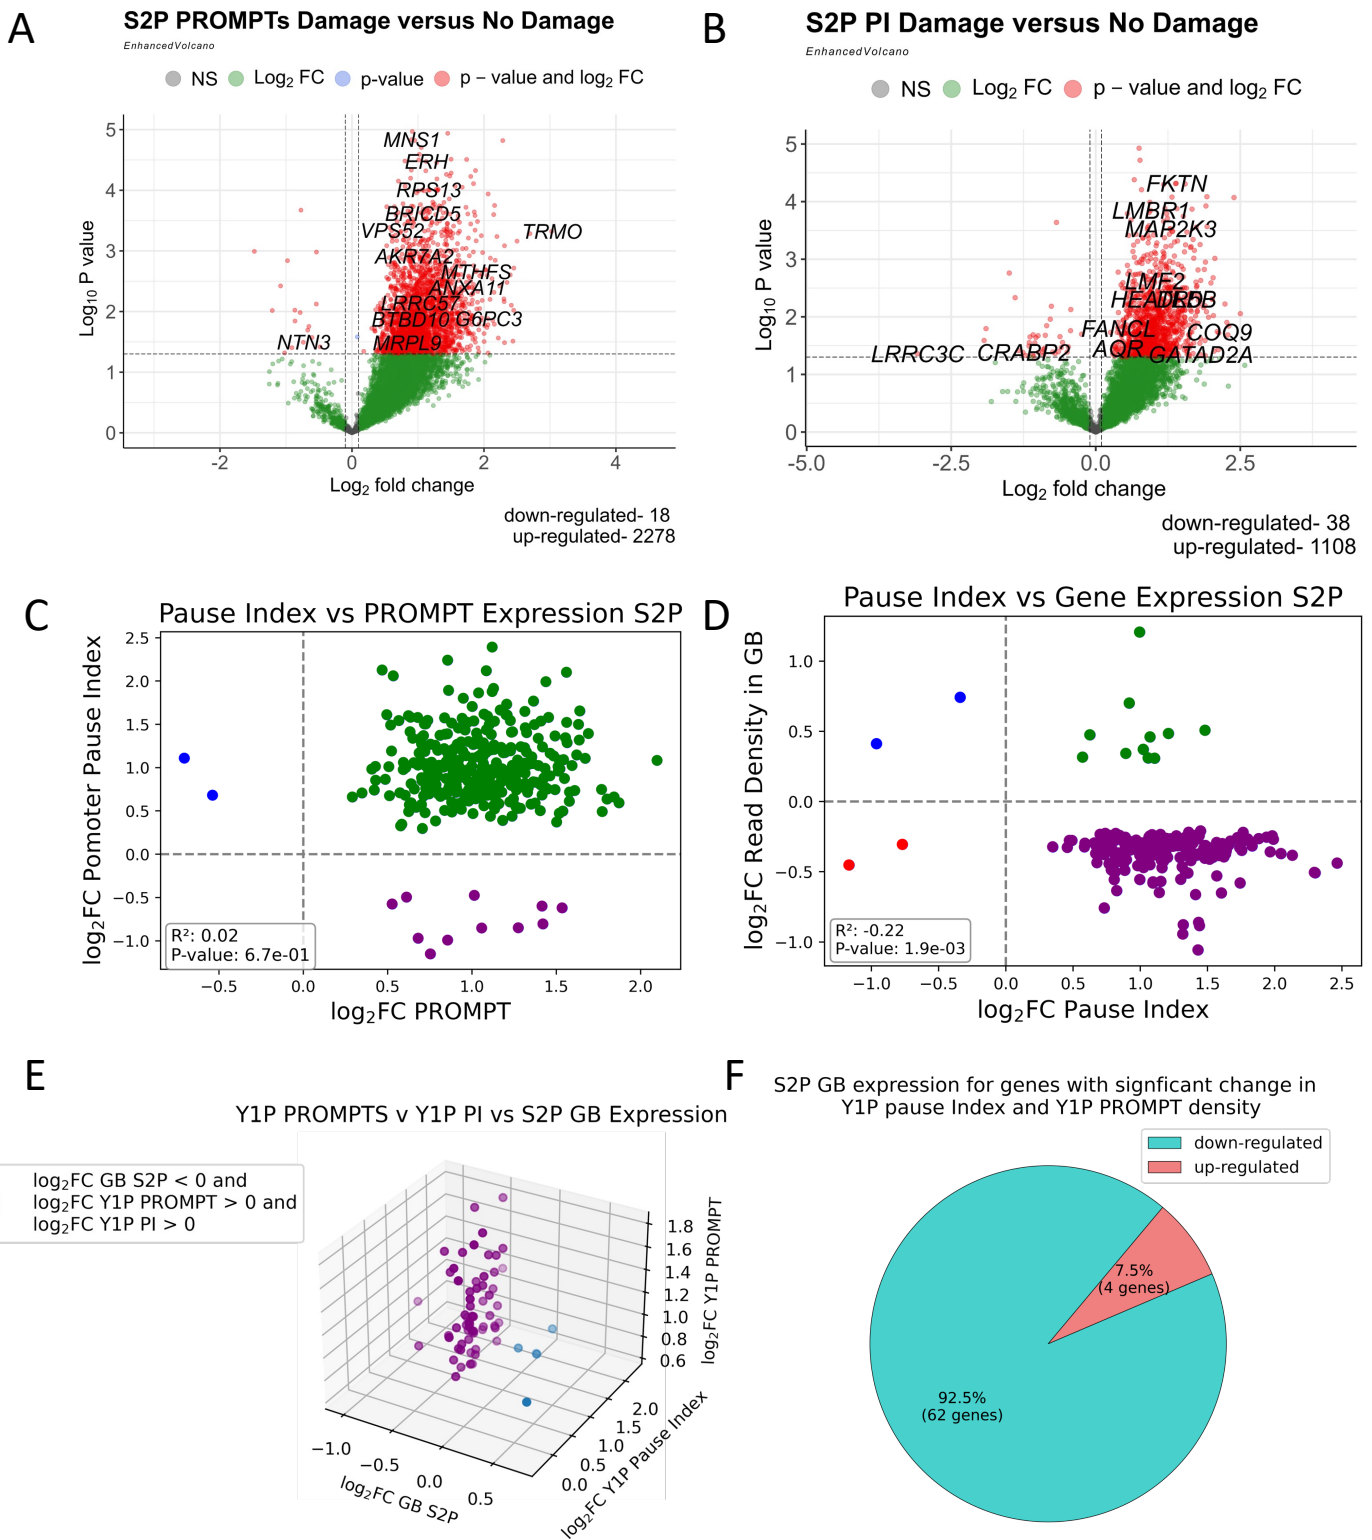

**Figure S7.** PROMPTs analysis of S2P RNAPII upon DNA damage. **A)** Volcano plots of differentially expressed PROMPTs from S2P upon IR. **B)** Volcano plots showing differential PI of protein-coding genes from S2P samples upon IR. **C)** Scatter plot showing log<sub>2</sub>FoldChange in PROMPT expression with associated log<sub>2</sub>FoldChange in PI of protein-coding genes from S2P sample on radiation treatment. **D)** Scatter plot showing log<sub>2</sub>FoldChange in PROMPT expression with associated log<sub>2</sub>FoldChange in PI of protein-coding genes from S5P sample on radiation treatment. **E)** Three-dimensional scatter plot comparing log<sub>2</sub>FoldChange in S2P GB expression with log<sub>2</sub>FoldChange in Y1P PI and log<sub>2</sub>FoldChange in Y1P PROMPT of protein-coding genes from S2P samples upon IR treatment. Only protein-coding genes that show significant ( $p < 0.05$ ) change in Y1P PROMPT expression, Y1P PI and S2P GB expression upon IR were included in the analysis. **F)** Pie chart showing percentage of down-regulated and up-regulated genes among the protein-coding genes that show significant ( $p < 0.05$ ) change in Y1P PROMPT expression, Y1P PI and S2P GB expression upon IR.
