# Supplementary material for: Tyrosine 1–phosphorylated RNA polymerase II transcribes PROMPTs to facilitate proximal promoter pausing and induce global transcriptional repression in response to DNA damage
Source: PubMed Central journal article supplement (PMC10984383; doi:10.1101/gr.278644.123), 2024-02
Supplement: Supplemental_Fig_S8.pdf [file Supplemental_Fig_S8.pdf]

A

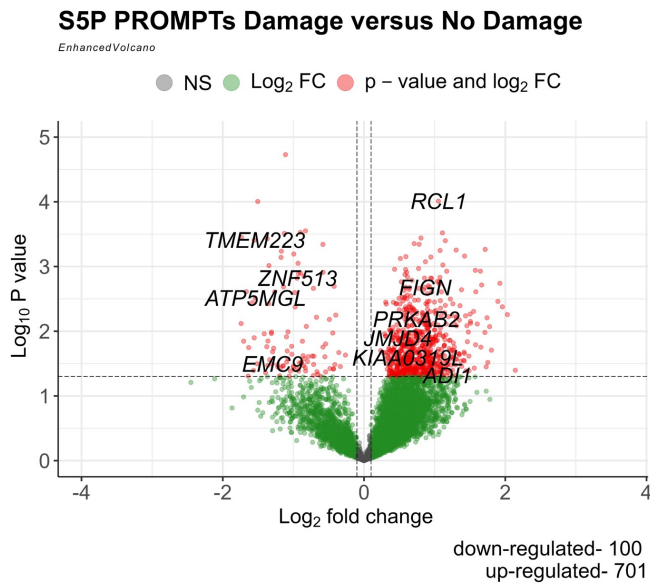

B

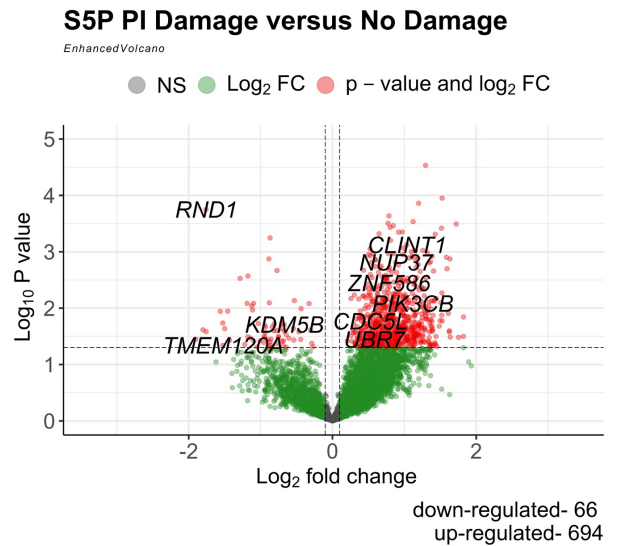

C

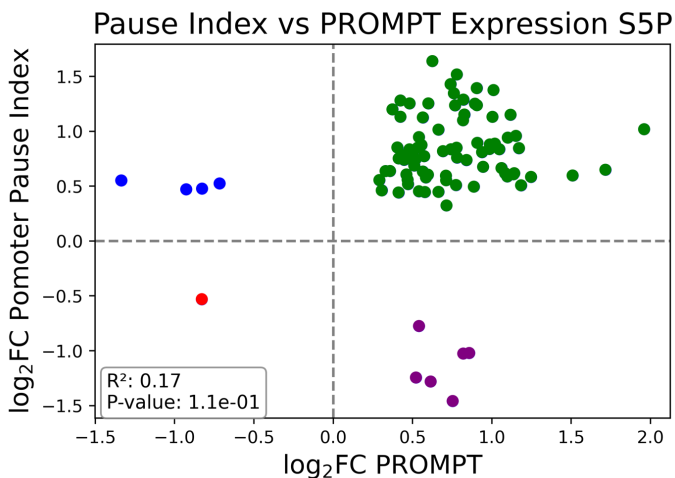

D

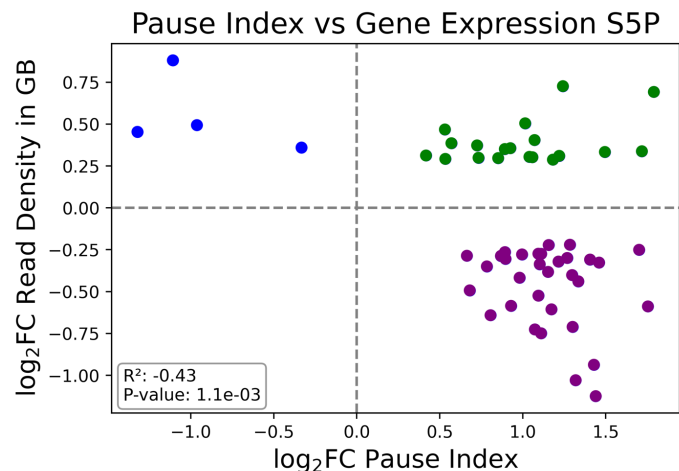

**Figure S8.** Promoter pausing index analysis of S5P RNAPII upon DNA damage. **A)** Volcano plots showing differential PROMPTs of protein-coding genes from S5P samples upon IR. **B)** Volcano plots showing differential PI of protein-coding genes from S5P samples upon IR. **C)** Scatter plot showing log<sub>2</sub>FoldChange in PROMPTs expression with associated log<sub>2</sub>FoldChange in PI of protein-coding genes from S5P sample on IR treatment. **D)** Scatter plot showing log<sub>2</sub>FoldChange in GB expression with associated log<sub>2</sub>FoldChange in PI of protein-coding genes from S5P sample upon IR treatment.
