# Supplementary material for: Tyrosine 1–phosphorylated RNA polymerase II transcribes PROMPTs to facilitate proximal promoter pausing and induce global transcriptional repression in response to DNA damage
Source: PubMed Central journal article supplement (PMC10984383; doi:10.1101/gr.278644.123), 2024-02
Supplement: Supplemental_Fig_S9.pdf [file Supplemental_Fig_S9.pdf]

A

## Top 10 RNA binding protein motifs

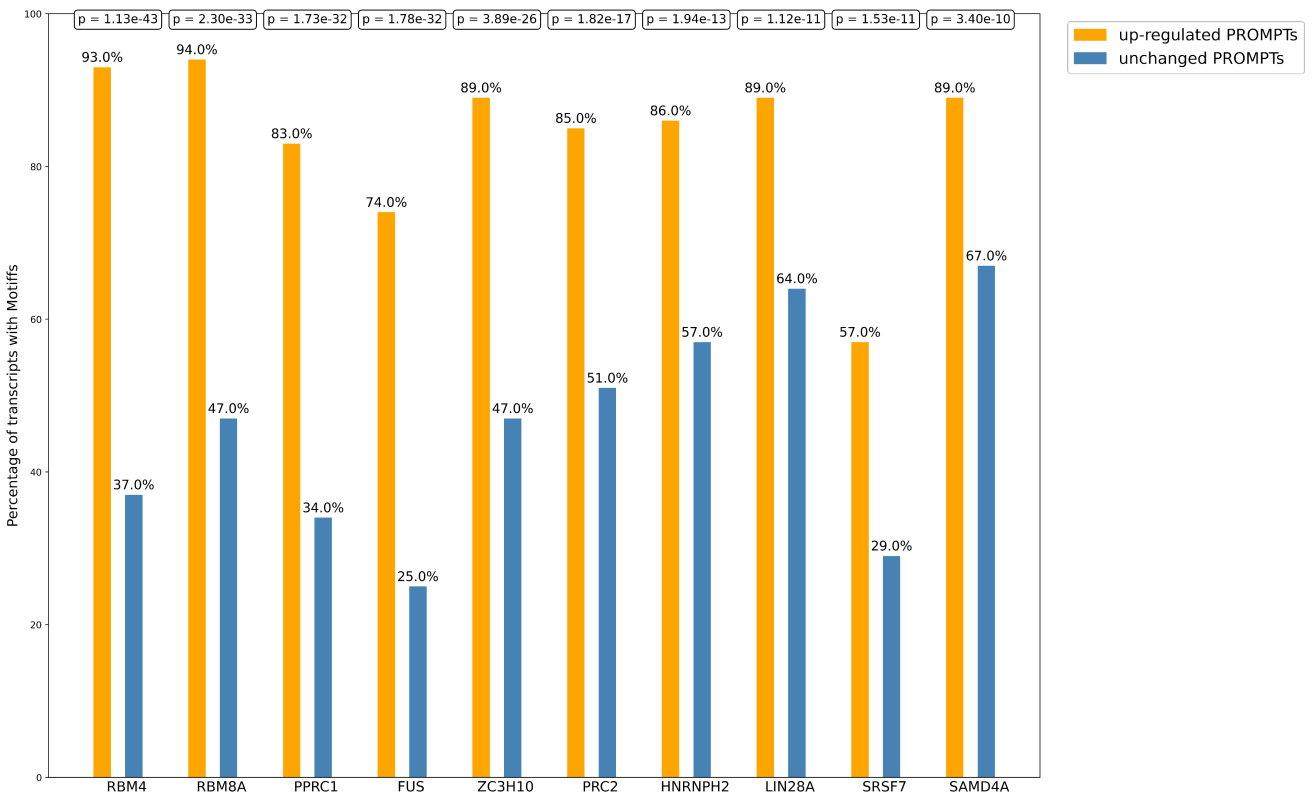

B

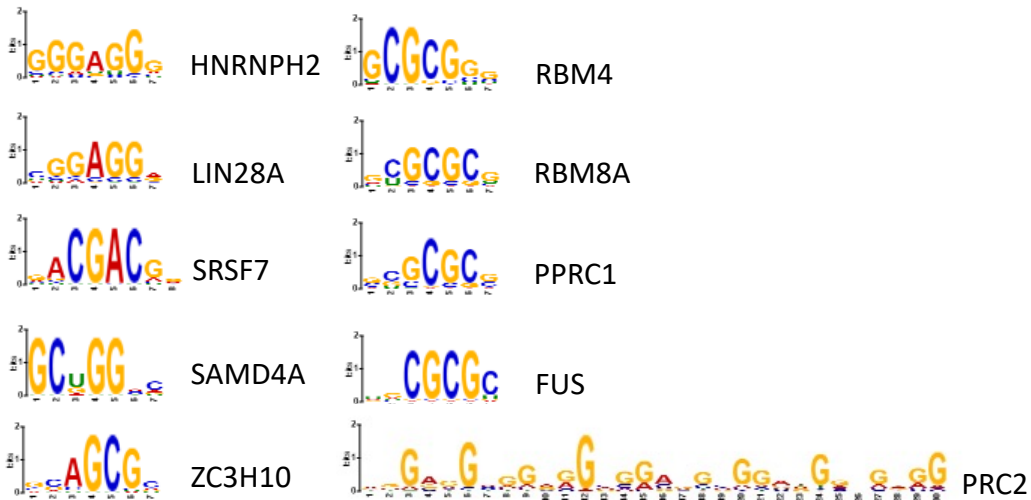

**Figure S9.** Enrichment analysis of top 10 RNA binding motifs on up-regulated PROMPTs vs unchanged PROMPTs. **A)** Bar charts showing percentage of sequences containing RNA binding protein motifs among the up-regulated ( $p$  value  $< 0.05$ ,  $\log_2FC > 0.1$ ) PROMPTs which are correlated with down-regulated GB expression and increased PI upon IR from Y1P samples vs unchanged PROMPTs. Mann-Whitney  $U$  test was used to compute statistical significance in the difference in enrichment of top 10 RNA binding protein motifs between up-regulated and unchanged PROMPTs. **B)** Binding motifs of 10 top RNA binding proteins ranked based on significant enrichment of binding sites on up-regulated PROMPTs compared with unchanged PROMPTs.
