# Supplementary material for: Tyrosine 1–phosphorylated RNA polymerase II transcribes PROMPTs to facilitate proximal promoter pausing and induce global transcriptional repression in response to DNA damage
Source: PubMed Central journal article supplement (PMC10984383; doi:10.1101/gr.278644.123), 2024-02
Supplement: Supplemental_Fig_S10.pdf [file Supplemental_Fig_S10.pdf]

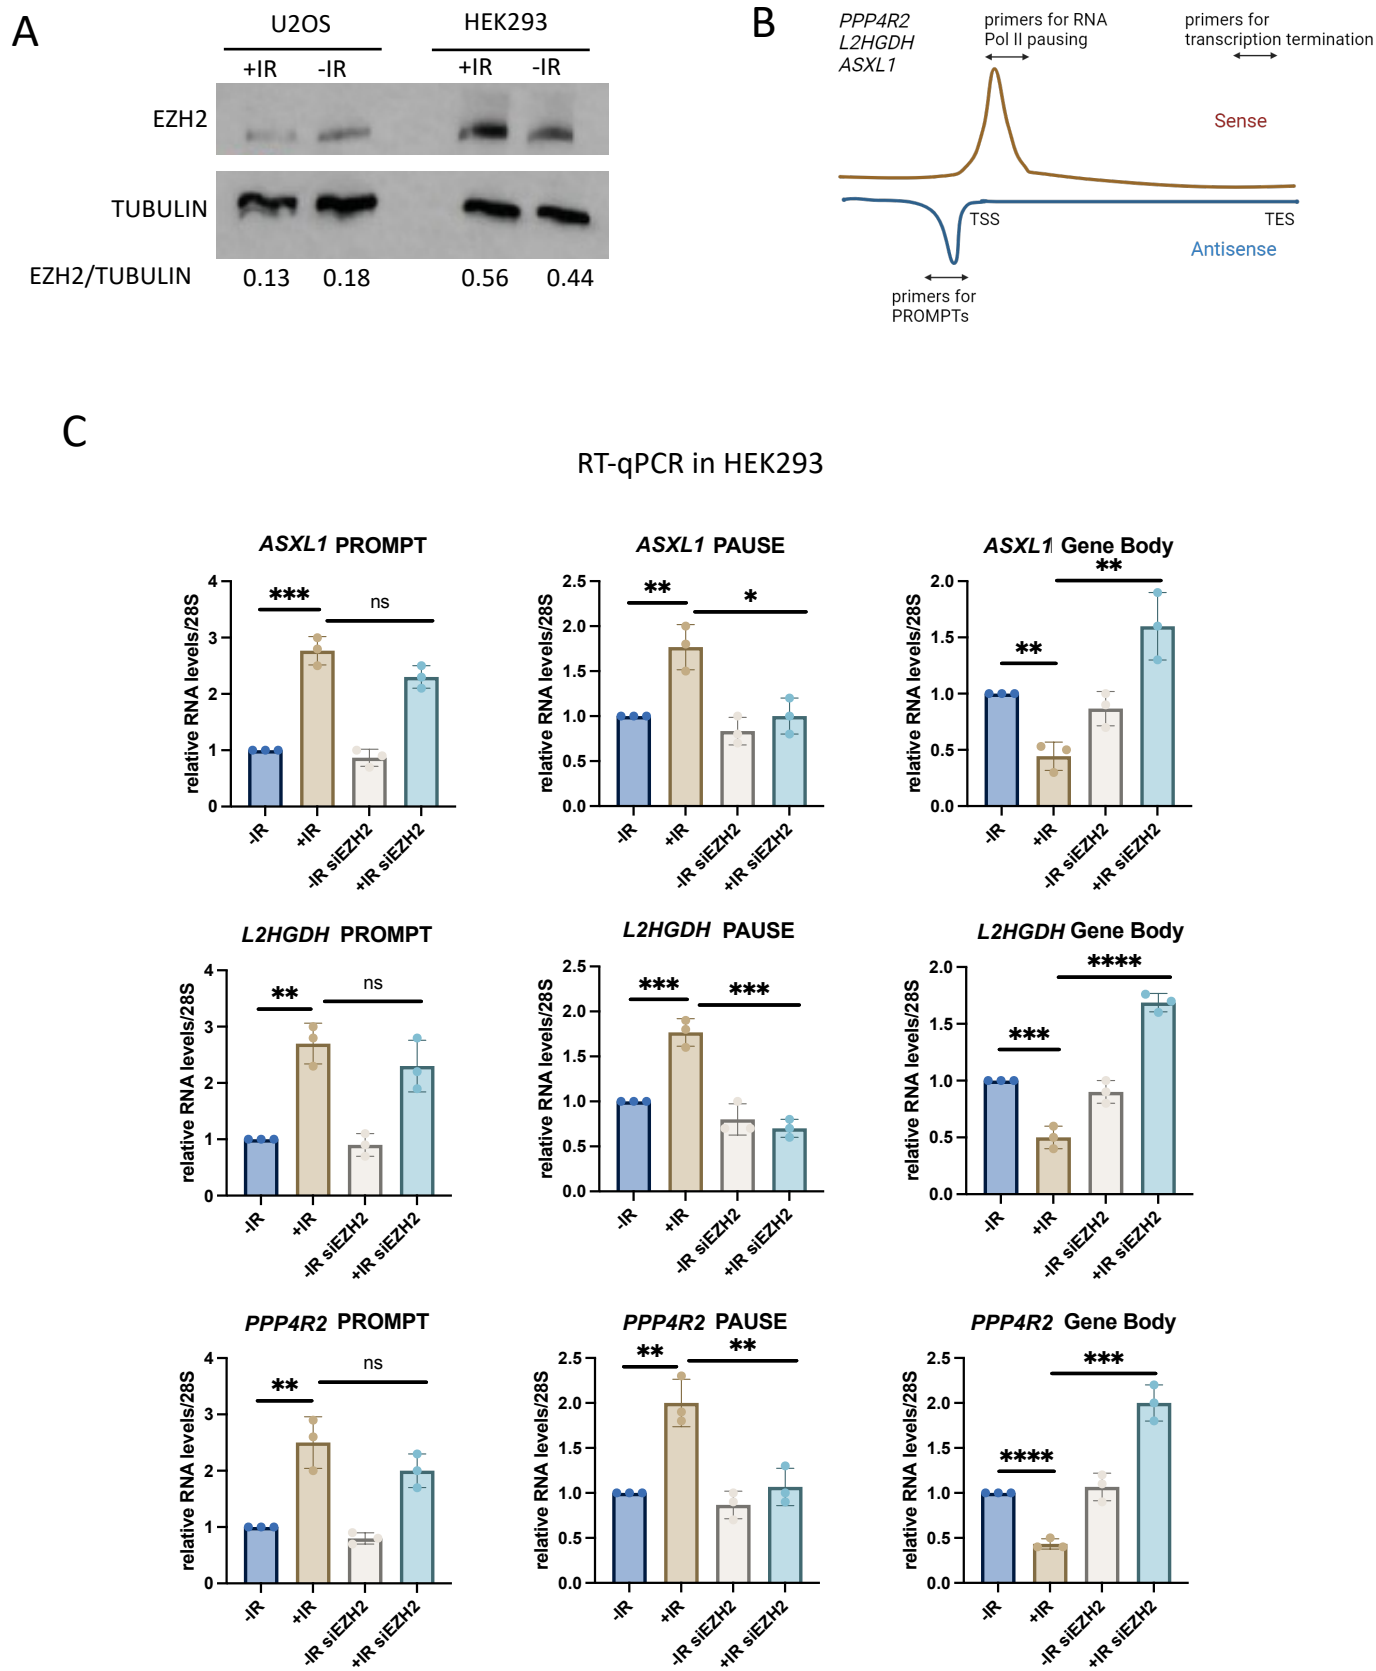

**Figure S10.** Analysis of protein and RNA levels. **A)** Western blot showing levels of EZH2 in U2OS and HEK293 cells upon IR. **B)** Positions of primers used for RT-qPCRs. **C)** Bar charts showing RT-qPCR analysis of PROMPTS, PAUSE and Gene Body derived RNA at three selected genes. Unpaired *t*-test was used to assess statistical significance. \* < 0.05, \*\* < 0.01, \*\*\* < 0.001, \*\*\*\* < 0.0001.
