# Supplementary material for: Tyrosine 1–phosphorylated RNA polymerase II transcribes PROMPTs to facilitate proximal promoter pausing and induce global transcriptional repression in response to DNA damage
Source: PubMed Central journal article supplement (PMC10984383; doi:10.1101/gr.278644.123), 2024-02
Supplement: Supplemental_Fig_S11.pdf [file Supplemental_Fig_S11.pdf]

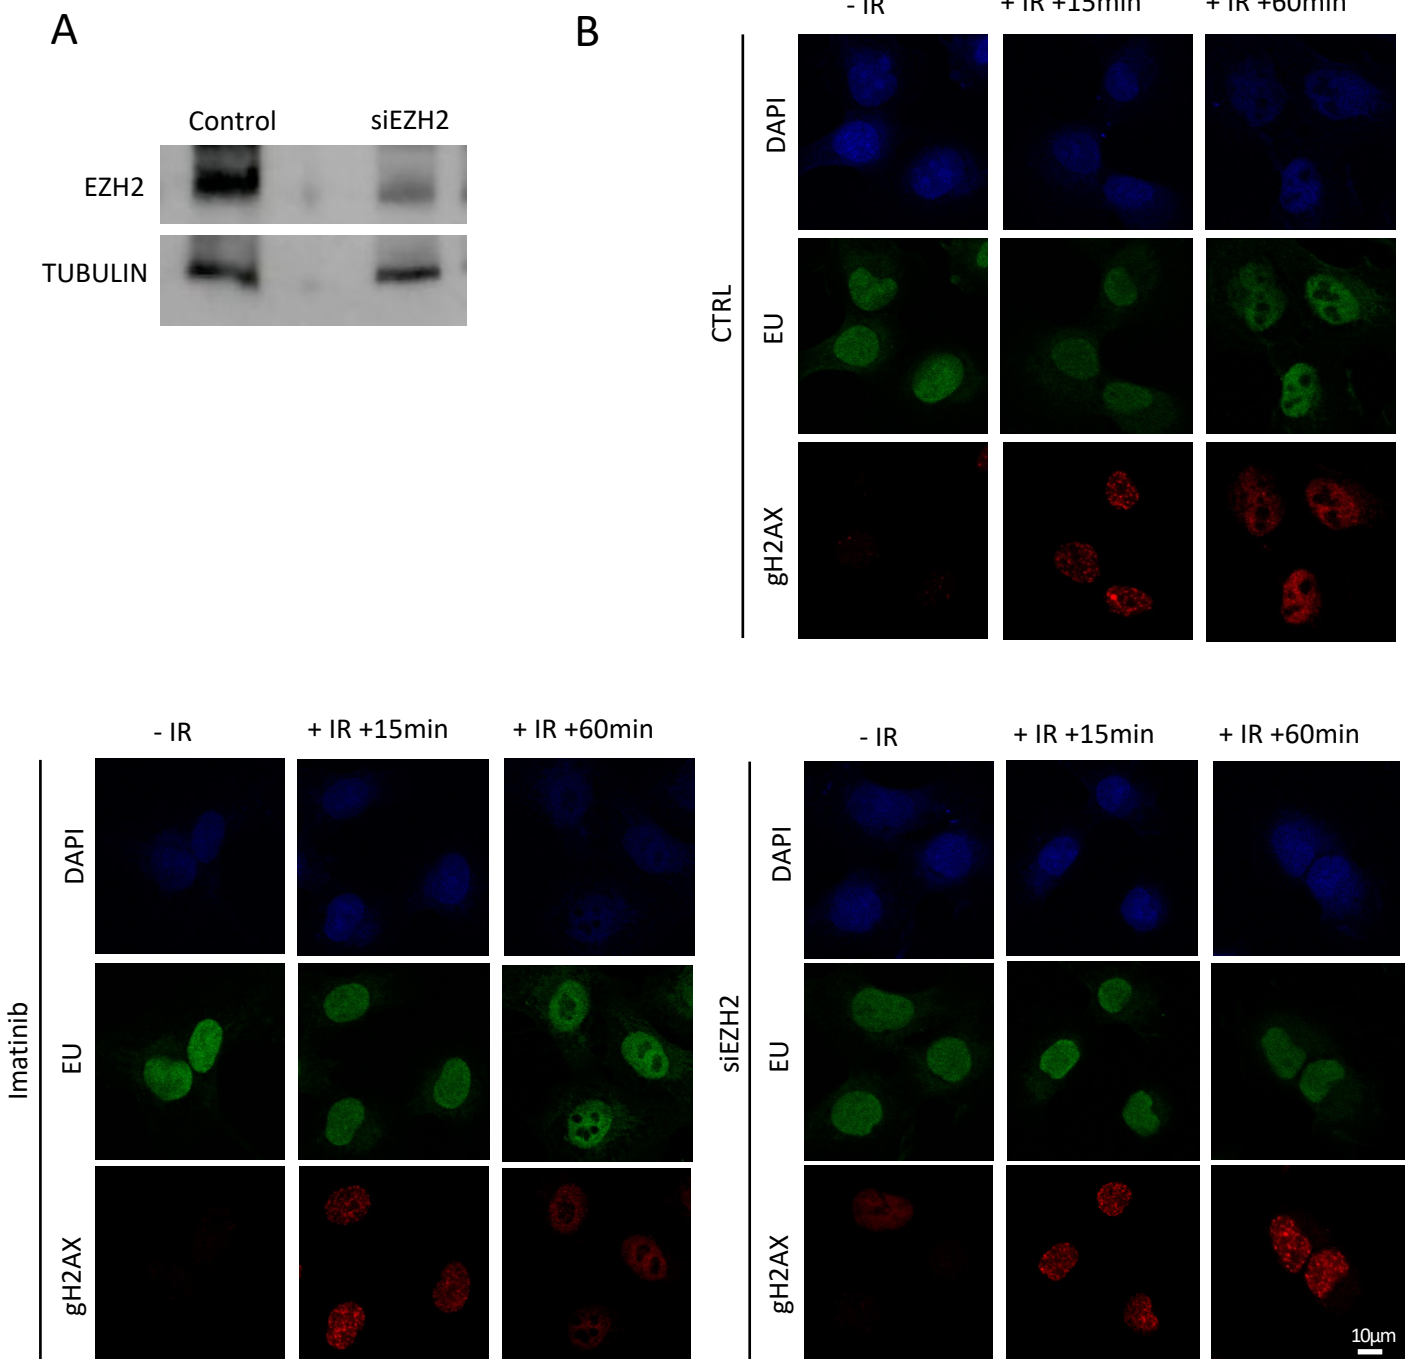

**Figure S11.** Analysis of nascent RNA levels using EU staining. **A)** Western blot showing levels of EZH2 in wt and siRNA treated cells. **B)** Representative images showing EU staining of nascent RNA in cells exposed to IR, DAPI stains nuclei, EU staining is shown in green and gH2AX is shown in red.
