# Supplementary material for: Tyrosine 1–phosphorylated RNA polymerase II transcribes PROMPTs to facilitate proximal promoter pausing and induce global transcriptional repression in response to DNA damage
Source: PubMed Central journal article supplement (PMC10984383; doi:10.1101/gr.278644.123), 2024-02
Supplement: Supplemental_Fig_S12.pdf [file Supplemental_Fig_S12.pdf]

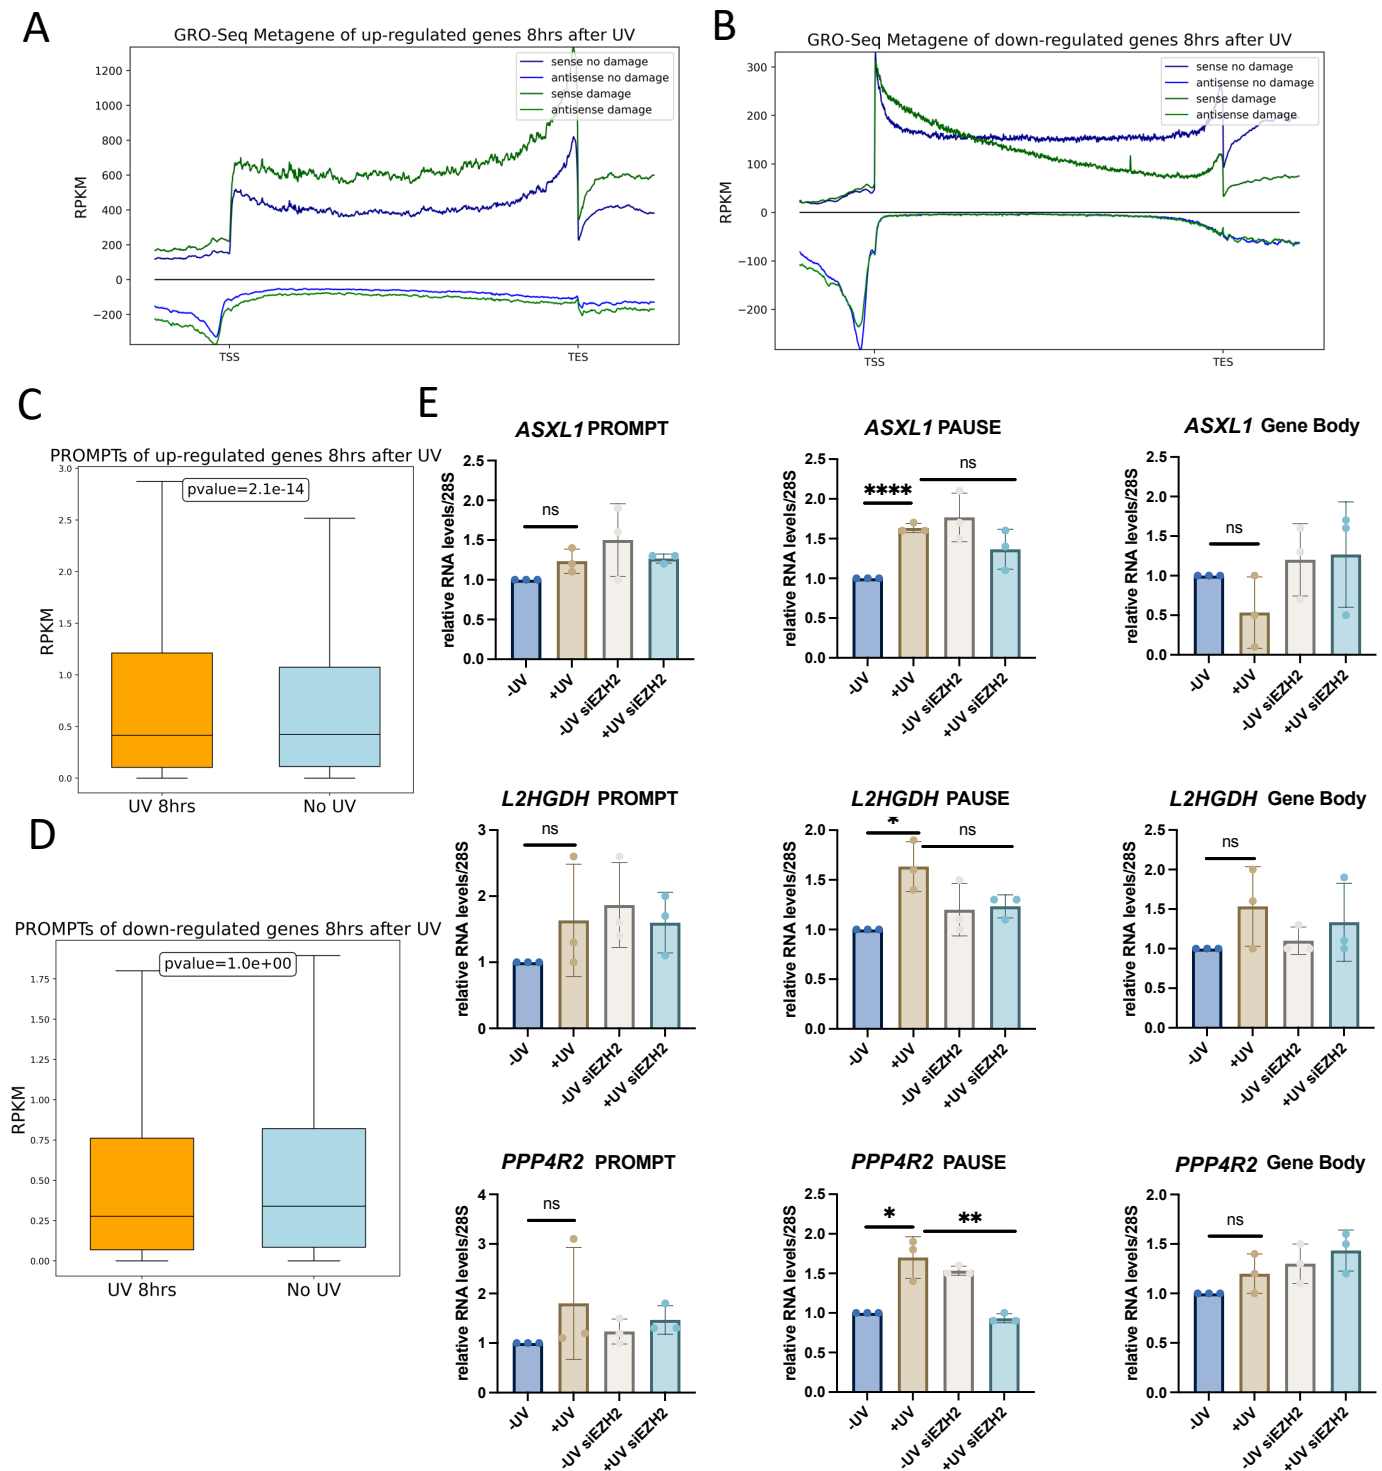

**Figure S12.** Analysis of nascent transcriptome following UV exposure. **A)** GRO-seq metagene profile showing sense and antisense transcription across GB of down-regulated genes from UV exposed and untreated samples. **B)** GRO-seq metagene profile showing sense and antisense transcription across GB of up-regulated genes from UV exposed and untreated samples. Differentially expressed genes were described as genes showing significant increase in gene expression based on RNA-Seq data comparing UV treated samples following 8hr incubation with untreated samples. **C)** Box plot indicates GRO-Seq read coverage across PROMPTs of up-regulated genes from UV exposed and untreated samples. Two sample Wilcoxon test is used to compute statistical significance of difference in PROMPT expression for down-regulated genes between from UV exposed and untreated samples. **D)** Box plot indicates GRO-Seq read coverage across PROMPTs of down-regulated genes from UV exposed and untreated samples. Two sample Wilcoxon test is used to compute statistical significance of difference in PROMPT expression for down-regulated genes between from UV exposed and untreated samples. **E)** Bar charts showing RT-qPCR analysis of PROMPTs, PAUSE and Gene Body derived RNA in U2OS cells following UV treatment at three selected genes. Unpaired *t*-test was used to assess statistical significance. \* < 0.05.
